# Supplementary material for: A modelling study highlights the power of detecting and isolating asymptomatic or very mildly affected individuals for COVID-19 epidemic management
Source: Springer Nature journal article supplement (doi:10.1186/s12889-020-09843-7), 2020-11-27
Supplement: MOESM1 [file 18634964]

Supplementary Information for  
 A modelling study highlights the power of  
 detecting and isolating asymptomatic or very  
 mildly affected individuals for COVID-19  
 epidemic management.

Lía Mayorga, Clara García Samartino, Gabriel Flores, Sofía Masuelli,  
 María V. Sánchez, Luis S. Mayorga and Cristián G. Sánchez

## 1. Computation of the effective reproduction number $R_e$

The basic reproduction number for an arbitrary compartmental model can be obtained following the method described in [1]. Given the system of differential equations

$$\begin{aligned}
 \dot{H} &= -\beta I_S S - \beta' I_A S \\
 \dot{E} &= \beta I_S S + \beta' I_A S - \mu E \\
 \dot{I}_A &= p_A \mu E - (1 - p_{AI})(1/D_{recA})I_A - p_{AI}(1/D_A)I_A \\
 \dot{I}_S &= (1 - p_A)\mu E - \gamma I_S \\
 \dot{A} &= p_{AI}(1/D_A)I_A - (1/(D_{recA} - D_A))A \\
 \dot{L} &= (1 - p_H)\gamma I_S - (1/D_{rec})L \\
 \dot{O} &= p_H \gamma I_S - (1 - p_{ICU})(1/D_{rec})O - p_{ICU}(1/D_{lag})O \\
 \dot{H}_{ICU} &= p_{ICU}(1/D_{lag})O - (1 - p_F)(1/D_{recICU})H_{ICU} - p_F(1/D_{recICU})H_{ICU} \\
 \dot{R}_A &= (1 - p_{AI})(1/D_{recA})I_A + (1/(D_{recA} - D_A))A \\
 \dot{R}_S &= (1/D_{rec})L + (1 - p_{ICU})(1/D_{rec})O + (1 - p_F)(1/D_{recICU})H_{ICU} \\
 \dot{F} &= p_F(1/D_{recICU})H_{ICU}
 \end{aligned}$$

with  $\beta = R_0(1/D_{inf})$ ,  $\beta' = f_A R_0(1/D_{inf})$ ,  $\mu = (1/D_{inc})$  y  $\gamma = (1/D_{inf})$  the effective reproduction number  $R_e$  can be calculated as follows:

Assuming with no loss of generality a disease free state corresponding to  $S = 1$  and all other variables equal to zero ( $x_0$ ) we have that, for the variables

$E$ ,  $I_A$  and  $I_S$ , in the standard notation

$$\mathcal{F}(x_0) = \begin{pmatrix} \beta I_S + \beta' I_A \\ 0 \\ 0 \end{pmatrix}$$

and

$$\mathcal{V}(x_0) = \begin{pmatrix} -\mu E \\ p_A \mu E - ((1 - p_{AI}/D_{rec} - p_{AI}/D_A) I_A) \\ (1 - p_A) \mu E - \gamma I_S \end{pmatrix}$$

The corresponding Jacobian matrices are:

$$F = \begin{bmatrix} 0 & \frac{R_0 f_A}{D_{inf}} & \frac{R_0}{D_{inf}} \\ 0 & 0 & 0 \\ 0 & 0 & 0 \end{bmatrix}$$

and

$$V = \begin{bmatrix} -\mu & 0 & 0 \\ p_A \mu & -((1 - p_{AI}/D_{rec} - p_{AI}/D_A)) & 0 \\ (1 - p_A) \mu & 0 & -\gamma \end{bmatrix}$$

The effective reproduction number is calculated as the largest eigenvalue of the next generation matrix  $FV^{-1}$  obtaining

$$R_e = R_0 (1 - p_A) + \frac{R_0 f_A p_A}{D_{inf} \left( \frac{1 - p_{AI}}{D_{recA}} + \frac{p_{AI}}{D_A} \right)}.$$

Note that for the case in which  $p_A = 0$   $R_e = R_0$  as expected. With no isolation of asymptomatic patients, that is with  $p_{AI} = 0$ ,  $R_e$  might be larger than  $R_0$  since asymptomatic individuals remain infective for a time that is larger than  $D_{inf}$ .

## Referencias

- [1] Van den Driessche, P., and Watmough, J. (2002). Reproduction numbers and sub-threshold endemic equilibria for compartmental models of disease transmission. *Mathematical Biosciences*, 180(1-2), 29-48. [http://doi.org/10.1016/S0025-5564\(02\)00108-6](http://doi.org/10.1016/S0025-5564(02)00108-6)
